# Supplementary material for: Characterisation of a 3-hydroxypropionic acid-inducible system from Pseudomonas putida for orthogonal gene expression control in Escherichia coli and Cupriavidus necator
Source: PubMed Central journal article supplement (PMC5431877; doi:10.1038/s41598-017-01850-w), 2017-05-11
Supplement: 41598_2017_1850_MOESM1_ESM.pdf [file 41598_2017_1850_MOESM1_ESM.pdf]

1 **Supplementary information**

2

3 Characterisation of a 3-hydroxypropionic acid-inducible system  
4 from *Pseudomonas putida* for orthogonal gene expression control  
5 in *Escherichia coli* and *Cupriavidus necator*

6

7 Erik K. R. Hanco<sup>1</sup>, Nigel P. Minton<sup>1</sup>, Naglis Malys<sup>1\*</sup>

8

9 <sup>1</sup>BBSRC/EPSCR Synthetic Biology Research Centre (SBRC), School of Life Sciences, Centre  
10 for Biomolecular Sciences, The University of Nottingham, Nottingham NG7 2RD, United  
11 Kingdom

12

13 \*Author to whom correspondence should be addressed, E-Mail: Naglis.Malys@nottingham.ac.uk

## 1 **Supplementary Methods**

2

### 3 **Expression and purification of HpdR**

4 Multiple attempts to purify the transcriptional regulator HpdR by His- or Strep-tag affinity  
5 chromatography resulted in insoluble protein, confirming previous observations that a majority  
6 of members from the LysR family tend to readily form inclusion bodies<sup>1</sup>. However, a small  
7 amount of soluble protein was obtained as a glutathione S-transferase (GST)-tagged version of  
8 HpdR. The vector encoding GST-HpdR fusion protein, pEH089, was assembled by NEBuilder  
9 Hifi of *hpdR*, which was amplified with oligonucleotide primers EH196<sub>r</sub> and EH197<sub>f</sub>, and  
10 BamHI/NotI digested pGEX-6P-1. To decidedly ensure that potential DNA-shifts are caused by  
11 HpdR binding, GST was simultaneously expressed from the original vector that was employed  
12 to construct the GST-HpdR fusion, pGEX-6P-1 (GE Healthcare), purified and subjected to  
13 electrophoretic mobility shift assay.

14 100 ml of fresh LB-ampicillin (100 µg/ml) were inoculated 1:100 with an overnight culture of  
15 *E. coli* Rosetta (DE3) (Novagen) harbouring either pGEX-6P-1 or pEH089. The cultures were  
16 incubated at 37°C and 200 rpm. At an OD<sub>600</sub> of 0.5, protein expression was induced with 0.5  
17 mM isopropyl-β-D-thiogalactopyranoside (IPTG). The cultures were grown for another 3 hours  
18 at 20°C and 220 rpm. Subsequently, cells were harvested by centrifugation at 6,000 rpm and 4°C  
19 for 8 minutes, resuspended in 2 ml phosphate buffered saline (PBS) and centrifuged as before.  
20 The supernatant was removed and pellets were frozen at -20°C.

21 Thawed cells were resuspended in 1 ml lysis buffer (50 mM HEPES pH 7.5, 300 mM NaCl,  
22 10 mM MgSO<sub>4</sub>, 0.2% NP-40, 5 µl protease inhibitor cocktail III (Calbiochem), 10 ng DNaseI)  
23 and lysed by sonication (10 cycles à 10 micron, 30 seconds on ice in between cycles). The cell  
24 lysate was cleared by centrifugation at 21,130 x g and 4°C for 30 minutes. The supernatant  
25 was transferred to 100 µl glutathione sepharose 4B beads (GE Healthcare) which had been  
26 equilibrated three times with 0.5 ml washing buffer (50 mM HEPES pH 7.5, 150 mM NaCl,  
27 0.2% NP-40). The suspension was incubated at 150 rpm and 4°C for 2 hours on a horizontal  
28 shaker. Subsequently, the sepharose beads were centrifuged at 500 x g at 4°C for 5 minutes and  
29 washed five times with washing buffer. The supernatant was removed, beads were resuspended  
30 in 100 µl elution buffer A (50 mM HEPES pH 7.9, 10 mM reduced glutathione, 0.2% NP-40) and  
31 incubated at 100 rpm and 4°C for 1 hour. To the suspension, 100 µl of protease cleavage buffer  
32 (50 mM HEPES pH 7.9, 300 mM NaCl, 2 mM EDTA, 2 mM DTT, 0.2% NP-40) were added to-  
33 gether with 12 units of PreScission Protease (protease-GST fusion, GE healthcare) and mixed at

1 100 rpm and 4°C for another 16 hours. The PreScission Protease-cleaved and in the supernatant  
2 released proteins (elution fraction A) were separated from the beads by centrifugation at 500 x g  
3 and 4°C for 5 minutes. Remaining unbound proteins were collected by washing twice with 150 µl  
4 elution buffer B (50 mM HEPES pH 7.9, 150 mM NaCl, 1 mM EDTA, 1mM DTT, 0.2% NP-40).  
5 Protein samples derived from the pGEX-6P-1 and pEH089 cultures were analysed by NuPAGE  
6 (4-12% Bis-Tris gel in MES running buffer, Invitrogen) according to the manufacturers' protocol.  
7

### 8 **Electrophoretic mobility shift assay (EMSA)**

9 The purified proteins from the elution fraction A were analysed for specific binding to the native  
10 *hpdR/hpdH* intergenic region. Prior EMSA, the concentration of HpdR was determined by  
11 comparison to NuPAGE of bovine serum albumin (BSA) dilution series.

12 The ATTO700-labelled *hpdR/hpdH* intergenic region was generated by PCR of pEH008 with  
13 oligonucleotide primers EHseq018.ATTO700 and EHseq003. EHseq018 is 5'-ATTO700-labelled.  
14 The resulting PCR product of 310 bp was gel-purified as described earlier. The total volume  
15 of the DNA-protein-binding reaction is 10 µl. It contains 50 pM of labelled PCR product, 10  
16 ng/µl salmon sperm DNA, 25 mM HEPES pH 7.9, 75 mM NaCl, 0.5 mM EDTA, 0.5 mM DTT,  
17 0.1% NP-40, 150 mM KCl, 2.5 mM MgCl<sub>2</sub>. A high KCl concentration has been demonstrated  
18 to facilitate DNA-protein-complex formation<sup>2</sup>. Furthermore, the binding reaction may contain  
19 300 nM HpdR (elution fraction A of pEH089 culture) or an equal volume of the elution fraction  
20 A derived from pGEX-6P-1, and 1 mM of 3-HP. Samples were incubated at 20°C for 30 minutes.  
21 10 µl of 50% (v/v) glycerol were added to each sample before being loaded onto a non-denaturing  
22 8% Tris-Glycine gel (Invitrogen). Electrophoresis was performed in Tris-Glycine native running  
23 buffer (Invitrogen) at 4°C for 2 hours and 120V. The gel was scanned using the Odyssey Clx  
24 infrared imaging system (Model 9120, LI-COR Biosciences) and can be seen in Supplementary  
25 Fig. S2a. Additionally, the EMSA was performed using different concentrations of HpdR  
26 (Supplementary Fig. S2b).

1 **Supplementary Tables and Figures**

2

3 **Supplementary Table S1. *P. denitrificans* ATCC 13867 HpdH, MmsA and MmsB**

4 **homologues.** The genomes of *P. putida* KT2440 and *C. necator* H16 were searched for  
5 homologues of *P. denitrificans* ATCC 13867 HpdH, MmsA and MmsB. The amino acid  
6 sequence identity (coverage) in % is listed for the identified homologues and their divergently  
7 encoded transcriptional regulators.

8

| Strain                             | Operon 1<br>HpdH | Regulator            | Operon 2<br>MmsA     | MmsB    | Regulator                |
|------------------------------------|------------------|----------------------|----------------------|---------|--------------------------|
| <i>P. denitrificans</i> ATCC 13867 | 100              | 100                  | 100                  | 100     | 100                      |
| <i>P. putida</i> KT2440            | 73 (96)          | 73 (96)              | 74 (98)              | 62 (99) | 44 (99)                  |
| <i>C. necator</i> H16              | 60 (96)          | 26 (64) <sup>a</sup> | 72 (99) <sup>b</sup> | 66 (98) | No homology <sup>c</sup> |

<sup>a</sup> A *P. denitrificans* MmsA homolog is located between the *C. necator* *hpdH* and its putative regulator, sharing 49% identity and 96% coverage (here termed MmsA1).

<sup>b</sup> Here termed MmsA2.

<sup>c</sup> Regulator is annotated to belong to the AraC family of transcriptional regulators.

1 **Supplementary Table S2. *P. putida* KT2440 HpdR and HpdH homologues.** List of  
2 HpdR and HpdH homologues from various *Pseudomonas* species sharing at least 70 % protein  
3 sequence identity with *P. putida* KT2440 HpdR and HpdH, respectively.

4

| Species                                         | HpdR Locus Tag   | Size (aa) | Coverage% (identity%) | HpdH Locus Tag   | Size (aa) | Coverage% (identity%) |
|-------------------------------------------------|------------------|-----------|-----------------------|------------------|-----------|-----------------------|
| <i>Pseudomonas putida</i> KT2440                | PP_0055          | 295       | 100 (100)             | PP_0056          | 550       | 100 (100)             |
| <i>Pseudomonas entomophila</i> L48              | PSEEN_RS00045    | 295       | 100 (96)              | PSEEN_RS00050    | 549       | 99 (91)               |
| <i>Pseudomonas parafulva</i> NBRC 16636         | PPA02S_RS02005   | 295       | 100 (96)              | PPA02S_RS02000   | 548       | 99 (91)               |
| <i>Pseudomonas plecoglossicida</i> NBRC 103162  | PPL01S_RS04640   | 295       | 100 (95)              | PPL01S_RS04635   | 548       | 99 (95)               |
| <i>Pseudomonas monteilii</i> GTC 10897          | APH46_RS25120    | 295       | 99 (95)               | APH46_RS25115    | 548       | 99 (94)               |
| <i>Pseudomonas mosselii</i> SJ10                | O165_RS23295     | 295       | 100 (95)              | O165_RS23300     | 549       | 99 (89)               |
| <i>Pseudomonas alkylphenolia</i> KL28           | PSAKL28_RS00210  | 295       | 100 (94)              | PSAKL28_RS00215  | 549       | 99 (83)               |
| <i>Pseudomonas vranovensis</i> DSM 16006        | H621_RS0106435   | 295       | 100 (94)              | H621_RS0106440   | 549       | 99 (84)               |
| <i>Pseudomonas japonica</i> NBRC 103040         | PJA01S_RS05195   | 295       | 100 (93)              | PJA01S_RS05200   | 549       | 96 (81)               |
| <i>Pseudomonas gingeri</i> NCPPB 3146           | PGING_RS31890    | 295       | 99 (88)               | PGING_RS31885    | 553       | 96 (81)               |
| <i>Pseudomonas fuscovaginatae</i> IRR1 6609     | PF66_RS17780     | 295       | 100 (88)              | PF66_RS17775     | 545       | 97 (81)               |
| <i>Pseudomonas taetrolens</i> DSM 21104         | TU78_RS12205     | 295       | 99 (87)               | TU78_RS12200     | 553       | 96 (79)               |
| <i>Pseudomonas fragi</i> B25                    | O5A_RS0119340    | 295       | 99 (86)               | O5A_RS0119330    | 553       | 97 (80)               |
| <i>Pseudomonas psychrophila</i> HA-4            | B347_RS0107760   | 295       | 99 (86)               | B347_RS0107770   | 553       | 96 (80)               |
| <i>Pseudomonas fluorescens</i> AU12597          | AA053_RS20570    | 295       | 99 (86)               | AA053_RS20565    | 553       | 96 (78)               |
| <i>Pseudomonas agarici</i> NCPPB 2289           | PAGAR_RS0113390  | 295       | 100 (87)              | PAGAR_RS0113385  | 553       | 96 (80)               |
| <i>Pseudomonas helleri</i> DSM 29165            | TU84_RS23875     | 295       | 100 (85)              | TU84_RS23880     | 553       | 96 (80)               |
| <i>Pseudomonas chlororaphis</i> 30-84           | PCHL3084_RS12165 | 297       | 100 (85)              | PCHL3084_RS12160 | 548       | 96 (79)               |
| <i>Pseudomonas deceptionensis</i> DSM 26521     | TR67_RS22630     | 295       | 99 (86)               | TR67_RS22625     | 553       | 96 (79)               |
| <i>Pseudomonas batumici</i> UCM B-321           | UCMB321_5547     | 295       | 100 (89)              | UCMB321_5548     | 549       | 99 (80)               |
| <i>Pseudomonas lini</i> ZBG1                    | ACS73_RS06805    | 294       | 99 (85)               | ACS73_RS06800    | 548       | 96 (80)               |
| <i>Pseudomonas umsongensis</i> UNC430CL58Co1    | N519_RS0117920   | 308       | 98 (85)               | N519_RS0117915   | 549       | 99 (79)               |
| <i>Pseudomonas cremoricolorata</i> ND07         | LK03_RS06240     | 295       | 100 (87)              | LK03_RS06245     | 549       | 99 (81)               |
| <i>Pseudomonas protegens</i> Cab57              | PPC_RS12670      | 297       | 99 (83)               | PPC_RS12665      | 548       | 98 (77)               |
| <i>Pseudomonas frederiksbergensis</i> SI8       | JZ00_RS11015     | 294       | 99 (84)               | JZ00_RS11010     | 547       | 97 (79)               |
| <i>Pseudomonas mediterranea</i> TEIC1105        | ADY55_RS24405    | 294       | 99 (84)               | ADY55_RS24410    | 547       | 97 (80)               |
| <i>Pseudomonas brassicacearum</i> PA1G7         | AW28_RS07090     | 294       | 99 (83)               | AW28_RS07085     | 547       | 95 (81)               |
| <i>Pseudomonas corrugata</i> TEIC1148           | ADY50_RS18415    | 294       | 99 (82)               | ADY50_RS18420    | 547       | 97 (79)               |
| <i>Pseudomonas trivialis</i> IHBB745            | AA957_RS03805    | 297       | 100 (79)              | AA957_RS03810    | 548       | 96 (78)               |
| <i>Pseudomonas orientalis</i> DSM 17489         | TU82_RS23530     | 296       | 100 (80)              | TU82_RS23535     | 548       | 96 (77)               |
| <i>Pseudomonas poae</i> DSM 14936               | TU75_RS20075     | 298       | 99 (79)               | TU75_RS20070     | 548       | 96 (78)               |
| <i>Pseudomonas tolaasii</i> 6264                | UQW_RS0110215    | 297       | 100 (79)              | UQW_RS0110210    | 548       | 98 (78)               |
| <i>Pseudomonas veronii</i> R4                   | SU91_RS20320     | 297       | 99 (79)               | SU91_RS20325     | 555       | 96 (78)               |
| <i>Pseudomonas synxantha</i> DSM 18928          | TU77_RS19905     | 297       | 100 (79)              | TU77_RS19910     | 548       | 99 (77)               |
| <i>Pseudomonas marginalis</i> ICMP 9505         | AO391_RS22020    | 297       | 100 (79)              | AO391_RS22025    | 548       | 96 (77)               |
| <i>Pseudomonas rhizosphaerae</i> IH5            | LT40_RS16020     | 295       | 99 (83)               | LT40_RS16015     | 550       | 98 (78)               |
| <i>Pseudomonas aeruginosa</i> AZPAE14918        | NS34_RS16205     | 301       | 99 (73)               | NS34_RS16200     | 557       | 96 (74)               |
| <i>Pseudomonas denitrificans</i> ATCC 13867     | H681_RS18595     | 304       | 99 (73)               | H681_RS18590     | 554       | 96 (73)               |
| <i>Pseudomonas knackmussii</i> B13              | PKB_RS05640      | 301       | 99 (72)               | PKB_RS05645      | 552       | 97 (72)               |
| <i>Pseudomonas nitroreducens</i> Aramco J       | QX33_RS11735     | 300       | 99 (74)               | QX33_RS11740     | 554       | 96 (73)               |
| <i>Pseudomonas citronellolis</i> TTU2014-008ASC | AO742_RS16215    | 297       | 99 (70)               | AO742_RS16210    | 552       | 97 (73)               |

1 **Supplementary Table S4. List of primers that were used in this study.** Restriction  
 2 sites that were incorporated for cloning are underlined.

3

| Primer name      | Primer sequence (5'→ 3')                                                                        |
|------------------|-------------------------------------------------------------------------------------------------|
| EH001_f          | tggtgagaatccaagcttcattcaggtcgaggtggccc                                                          |
| EH002_r          | ttatactaggcggttcggctgcggctggcgctggcct                                                           |
| EH003_f          | gccgcagccgaacgcctaggtataaacgcagaaaggccca                                                        |
| EH004_r          | tgttctccataggagaccacaacggtttcctctagaataatgttgaattcaaaagatctttaagaaggatatacatatgg                |
| EH005_f          | accgttgggtctccctatggagaaacagtagagattgcgataaaaagcg                                               |
| EH006_r          | cctcgacctgaatggaagcttgattctaccaataaaaaacgcccg                                                   |
| EH013_f          | ggatgacctgacgtataaacgcagaaaggcccacc                                                             |
| EH017_f          | cgccatagcgttctccttggaaattgtgtc                                                                  |
| EH018_r          | tatgacgtctcagtcctggcgaagcg                                                                      |
| EH019_f          | cgccatagcaacctcgcctc                                                                            |
| EH020_r          | tatgacgtctactcggctagcaactcgc                                                                    |
| EH021_f          | cgccatagagatagggtgggggttg                                                                       |
| EH022_r          | tatgacgtctcaacctccgccacgc                                                                       |
| EH023_f          | cgccataggctggcttctgcaaggatg                                                                     |
| EH024_r          | tatgacgtctaaagccgaacaccgact                                                                     |
| EH059_f          | gctactgccatagcaacctcgcctc                                                                       |
| EH060_r          | tcgtttatgacgtcgttgcctttatggcagttcg                                                              |
| EH061_f          | acttttacgcaacgcataattgtgt                                                                       |
| EH062_f          | acaacaattatgcttgcgtaaaagt                                                                       |
| EH095_r          | tcgtttatgacgtcagatcggtttttgtgcgt                                                                |
| EH096_f          | gctactcgccatagcgttctccttggaaattgtgtc                                                            |
| EH099_f          | gcctgtacctaggaacgaactgccataaaggacaag                                                            |
| EH100_r          | gtcctttatggcagttcgttcctaggtacaggcttgcctctg                                                      |
| EH138_f          | aacacgttccatttgaacctc                                                                           |
| EH139_r          | agttcgttcctaggcctgtgctaaaacgcacagc                                                              |
| EH148_r          | tcgtttatgacgtcatggcgagtagcgaagacgtta                                                            |
| EH165_r          | cagttcgttcctaggcgtgggttgcctctgtgctaaaa                                                          |
| EH166_r          | cagttcgttcctaggtacaaatccgccctgtgctaaaacgcac                                                     |
| EH167_r          | cagttcgttcctaggtacaggctatgttgtgctaaaacgcacagcgg                                                 |
| EH168_r          | cagttcgttcctaggtacaggcttgcctccacatcaaacgcacagcggctcgcg                                          |
| EH169_r          | cagttcgttcctaggtacaggcttgcctctgtgctgggtgcacagcggctcgcgaaat                                      |
| EH170_r          | cagttcgttcctaggtacaggcttgcctctgtgctaaaacatgtggcggctcgcgaaatctcgt                                |
| EH171_r          | cagttcgttcctaggtacaggcttgcctctgtgctaaaacgcacaaataattgcgcgaaatctcgtgtttc                         |
| EH172_r          | cagttcgttcctaggtacaggcttgcctctgtgctaaaacgcacagcggccatataaaatctcgtgtttcatccacgaaat               |
| EH173_r          | cagttcgttcctaggtacaggcttgcctctgtgctaaaacgcacagcggctcgcggggtcgtgtttcatccacgaaatctc               |
| EH174_r          | cagttcgttcctaggtacaggcttgcctctgtgctaaaacgcacagcggctcgcgaaatctacatctcatccacgaaatctc<br>taagatgga |
| EH175_f          | ataacgttctcgtactcgcctatgcaacctcgcctgtttttat                                                     |
| EH178_r          | cagttcgttcctaggcacaggcttgcctctgtgctaa                                                           |
| EH179_r          | cagttcgttcctaggtacaggcttgcctctgtgctaaaacgcacagcggctcgcgaaatctcatgtttcatccacgaaatctc<br>taagatg  |
| EH196_r          | ttctgtccagggcccctgggatccatgttcgactggaatgatctgc                                                  |
| EH197_f          | gatcgtcagtcagtcacgatcggccctactcggctagcaactcgc                                                   |
| EHseq018_ATT0700 | cgcagatcattccagtcgaaca                                                                          |
| EHseq003         | catacgaacttgaacgcgatgaact                                                                       |

1 **Supplementary Table S5. List of plasmids that were used and generated in this**  
2 **study.**  
3

| Plasmid                  | Characteristic                                                                                                                                                                                       | Reference or source |
|--------------------------|------------------------------------------------------------------------------------------------------------------------------------------------------------------------------------------------------|---------------------|
| pBBR1MCS-2-PphaC-eyfp-c1 | Kan <sup>r</sup> ; broad host range vector used to amplify the origin of replication                                                                                                                 | 3                   |
| pKTrfp                   | Cm <sup>r</sup> ; vector used to amplify <i>cmR</i> , <i>P<sub>araC-araC</sub></i> and <i>P<sub>araBAD-rfp-T<sub>dbl</sub></sub></i>                                                                 | 4                   |
| pGEX-6P-1                | Amp <sup>r</sup> ; vector used to generate <i>gst-hpdR</i> fusion                                                                                                                                    | GE Healthcare       |
| pEH006                   | Cm <sup>r</sup> ; <i>P<sub>araC-araC-T<sub>rrnB1</sub></sub></i> and <i>P<sub>araBAD-T7sl-EcRBS-rfp-T<sub>dbl</sub></sub></i> from pKTrfp assembled by NEBuilder                                     | This study          |
| pEH006E                  | Cm <sup>r</sup> ; empty vector; <i>rfp-T<sub>dbl</sub></i> from pKTrfp cloned into pEH006 by AatII and SbfI sites                                                                                    | This study          |
| pEH007                   | Cm <sup>r</sup> ; <i>P<sub>mmsR-mmsR-T<sub>rrnB1</sub></sub></i> and <i>P<sub>mmsA-rfp-T<sub>dbl</sub></sub></i> from <i>P. putida</i> KT2440 genomic DNA cloned into pEH006 by AatII and NdeI sites | This study          |
| pEH008                   | Cm <sup>r</sup> ; <i>P<sub>hpdR-hpdR-T<sub>rrnB1</sub></sub></i> and <i>P<sub>hpdH-rfp-T<sub>dbl</sub></sub></i> from <i>P. putida</i> KT2440 genomic DNA cloned into pEH006 by AatII and NdeI sites | This study          |
| pEH009                   | Cm <sup>r</sup> ; <i>P<sub>araC-araC-T<sub>rrnB1</sub></sub></i> and <i>P<sub>mmsA2-rfp-T<sub>dbl</sub></sub></i> from <i>C. necator</i> H16 genomic DNA cloned into pEH006 by AatII and NdeI sites  | This study          |
| pEH010                   | Cm <sup>r</sup> ; <i>P<sub>hpdR-hpdR-T<sub>rrnB1</sub></sub></i> and <i>P<sub>mmsA1-rfp-T<sub>dbl</sub></sub></i> from <i>C. necator</i> H16 genomic DNA cloned into pEH006 by AatII and NdeI sites  | This study          |
| pEH022                   | Cm <sup>r</sup> ; <i>P<sub>hpdH-rfp-T<sub>dbl</sub></sub></i> from <i>P. putida</i> KT2440 genomic DNA cloned into pEH006 by AatII and NdeI sites                                                    | This study          |
| pEH034                   | Cm <sup>r</sup> ; <i>P<sub>mmsA-rfp-T<sub>dbl</sub></sub></i> from <i>P. putida</i> KT2440 genomic DNA cloned into pEH006 by AatII and NdeI sites                                                    | This study          |
| pEH036                   | Cm <sup>r</sup> ; <i>P<sub>hpdR-hpdR-T<sub>rrnB1</sub></sub></i> and <i>P<sub>hpdH(-118)-rfp-T<sub>dbl</sub></sub></i> from pEH008 assembled by NEBuilder                                            | This study          |
| pEH053                   | Cm <sup>r</sup> ; <i>P<sub>hpdR-hpdR-T<sub>rrnB1</sub></sub></i> and <i>P<sub>hpdH(-106)-rfp-T<sub>dbl</sub></sub></i> from pEH008 cloned into pEH036 by AvrII and NdeI sites                        | This study          |
| pEH068                   | Cm <sup>r</sup> ; <i>P<sub>hpdR-hpdR-T<sub>rrnB1</sub></sub></i> and <i>P<sub>hpdH(-118.mut2)-rfp-T<sub>dbl</sub></sub></i> from pEH008 cloned into pEH036 by AvrII and NdeI sites                   | This study          |
| pEH069                   | Cm <sup>r</sup> ; <i>P<sub>hpdR-hpdR-T<sub>rrnB1</sub></sub></i> and <i>P<sub>hpdH(-118.mut3)-rfp-T<sub>dbl</sub></sub></i> from pEH008 cloned into pEH036 by AvrII and NdeI sites                   | This study          |
| pEH070                   | Cm <sup>r</sup> ; <i>P<sub>hpdR-hpdR-T<sub>rrnB1</sub></sub></i> and <i>P<sub>hpdH(-118.mut4)-rfp-T<sub>dbl</sub></sub></i> from pEH008 cloned into pEH036 by AvrII and NdeI sites                   | This study          |
| pEH071                   | Cm <sup>r</sup> ; <i>P<sub>hpdR-hpdR-T<sub>rrnB1</sub></sub></i> and <i>P<sub>hpdH(-118.mut5)-rfp-T<sub>dbl</sub></sub></i> from pEH008 cloned into pEH036 by AvrII and NdeI sites                   | This study          |
| pEH072                   | Cm <sup>r</sup> ; <i>P<sub>hpdR-hpdR-T<sub>rrnB1</sub></sub></i> and <i>P<sub>hpdH(-118.mut6)-rfp-T<sub>dbl</sub></sub></i> from pEH008 cloned into pEH036 by AvrII and NdeI sites                   | This study          |
| pEH073                   | Cm <sup>r</sup> ; <i>P<sub>hpdR-hpdR-T<sub>rrnB1</sub></sub></i> and <i>P<sub>hpdH(-118.mut7)-rfp-T<sub>dbl</sub></sub></i> from pEH008 cloned into pEH036 by AvrII and NdeI sites                   | This study          |
| pEH074                   | Cm <sup>r</sup> ; <i>P<sub>hpdR-hpdR-T<sub>rrnB1</sub></sub></i> and <i>P<sub>hpdH(-118.mut8)-rfp-T<sub>dbl</sub></sub></i> from pEH008 cloned into pEH036 by AvrII and NdeI sites                   | This study          |
| pEH075                   | Cm <sup>r</sup> ; <i>P<sub>hpdR-hpdR-T<sub>rrnB1</sub></sub></i> and <i>P<sub>hpdH(-118.mut9)-rfp-T<sub>dbl</sub></sub></i> from pEH008 cloned into pEH036 by AvrII and NdeI sites                   | This study          |
| pEH076                   | Cm <sup>r</sup> ; <i>P<sub>hpdR-hpdR-T<sub>rrnB1</sub></sub></i> and <i>P<sub>hpdH(-118.mut10)-rfp-T<sub>dbl</sub></sub></i> from pEH008 cloned into pEH036 by AvrII and NdeI sites                  | This study          |
| pEH077                   | Cm <sup>r</sup> ; <i>P<sub>hpdR-hpdR-T<sub>rrnB1</sub></sub></i> and <i>P<sub>hpdH(-118.mut11)-rfp-T<sub>dbl</sub></sub></i> from pEH008 cloned into pEH036 by AvrII and NdeI sites                  | This study          |
| pEH079                   | Cm <sup>r</sup> ; <i>P<sub>hpdR-hpdR-T<sub>rrnB1</sub></sub></i> and <i>P<sub>hpdH(-118.mut1)-rfp-T<sub>dbl</sub></sub></i> from pEH008 cloned into pEH036 by AvrII and NdeI sites                   | This study          |
| pEH080                   | Cm <sup>r</sup> ; <i>P<sub>hpdR-hpdR-T<sub>rrnB1</sub></sub></i> and <i>P<sub>hpdH(-118.mut12)-rfp-T<sub>dbl</sub></sub></i> from pEH008 cloned into pEH036 by AvrII and NdeI sites                  | This study          |
| pEH089                   | Amp <sup>r</sup> ; <i>hpdR</i> from <i>P. putida</i> KT2440 genomic DNA cloned into pGEX-6P-1 by NEBuilder                                                                                           | This study          |

1 **Supplementary Fig. S1. Secondary structure analysis of the *P. putida* KT2440**  
2 ***hpdR/hpdH* intergenic region.** The *hpdR/hpdH* intergenic region was analyzed with the  
3 mfold web server for potential secondary structures. Default settings were chosen to predict  
4 nucleic acid folding. The 5'- and 3'-ends represent the translational start sites of *hpdR* and  
5 *hpdH*, respectively. The calculated minimum free energy,  $\Delta G$ , is -36.06 kcal/mol.  
6

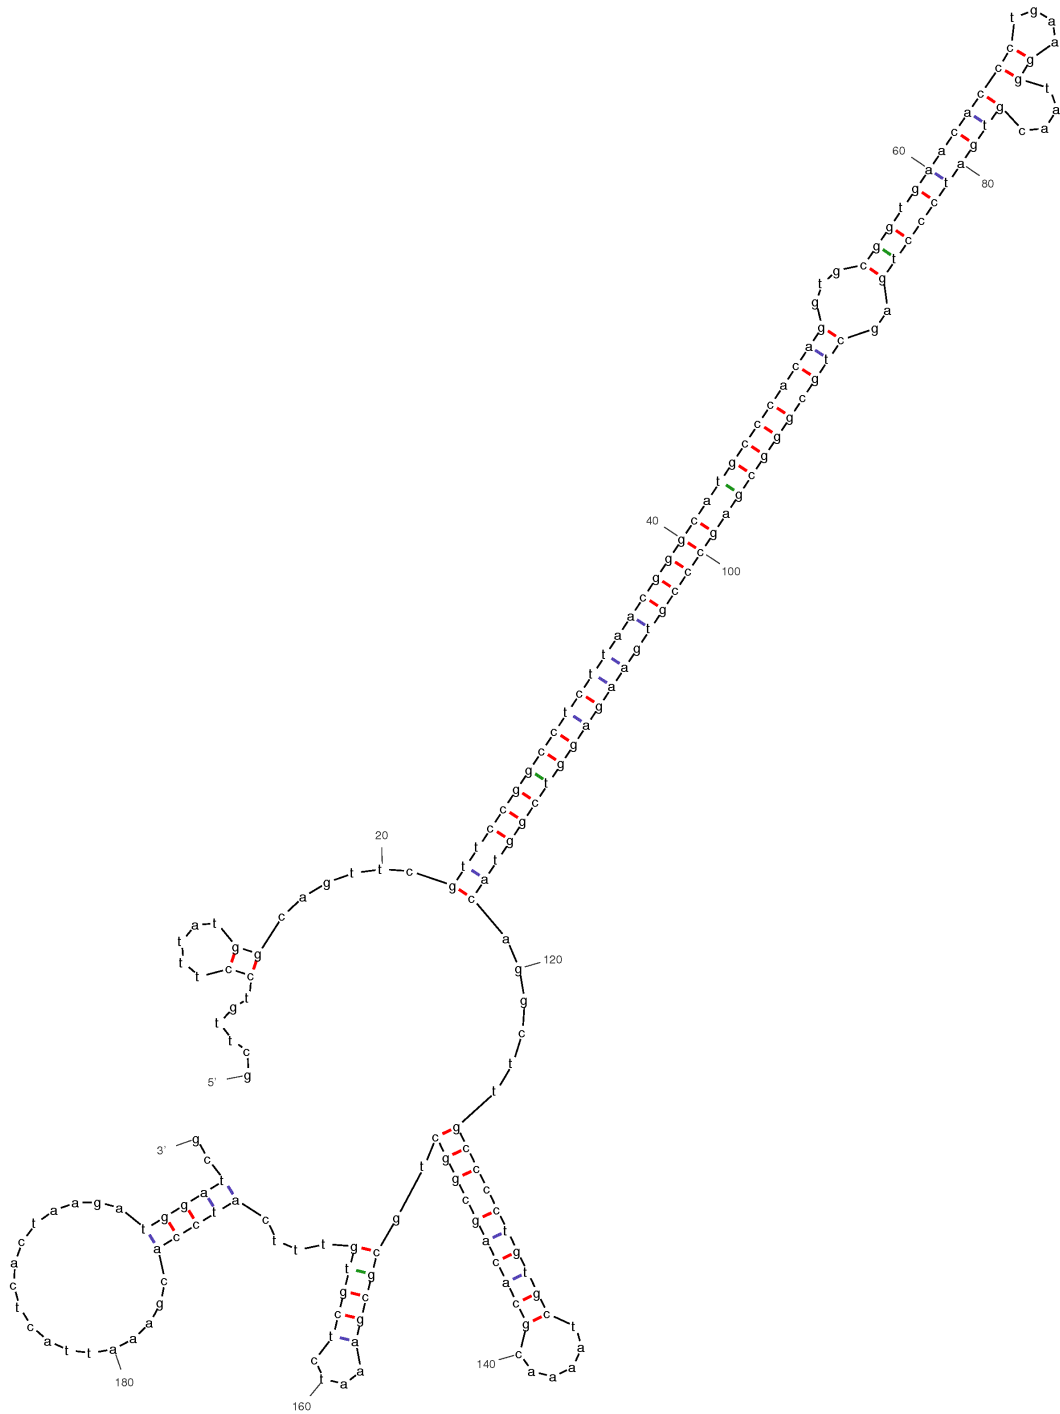



1 **Supplementary Fig. S2. EMSA of the native *hpdR/hpdH* intergenic region. (a)**  
 2 Effect of purified regulator and 3-HP on migration of labelled DNA. EF(-) and EF(+) refer to  
 3 elution fractions A from pGEX-6P-1 and pEH089 cultures, respectively. EF(-) does not contain  
 4 the transcriptional regulator HpdR. EF(+) contains HpdR. A slower-migrating secondary  
 5 DNA band can be seen in each of the lanes. Similar less abundant and slower-migrating  
 6 DNA of potentially different confirmation on non-denaturing protein gels have been reported  
 7 previously<sup>5,6</sup>. (b) Effect of different concentrations of purified regulator on migration of labelled  
 8 DNA. HpdR concentrations are 300 nM (lane 1), 150 nM (lane 2), 75 nM (lane 3) and no  
 9 regulator.  
 10

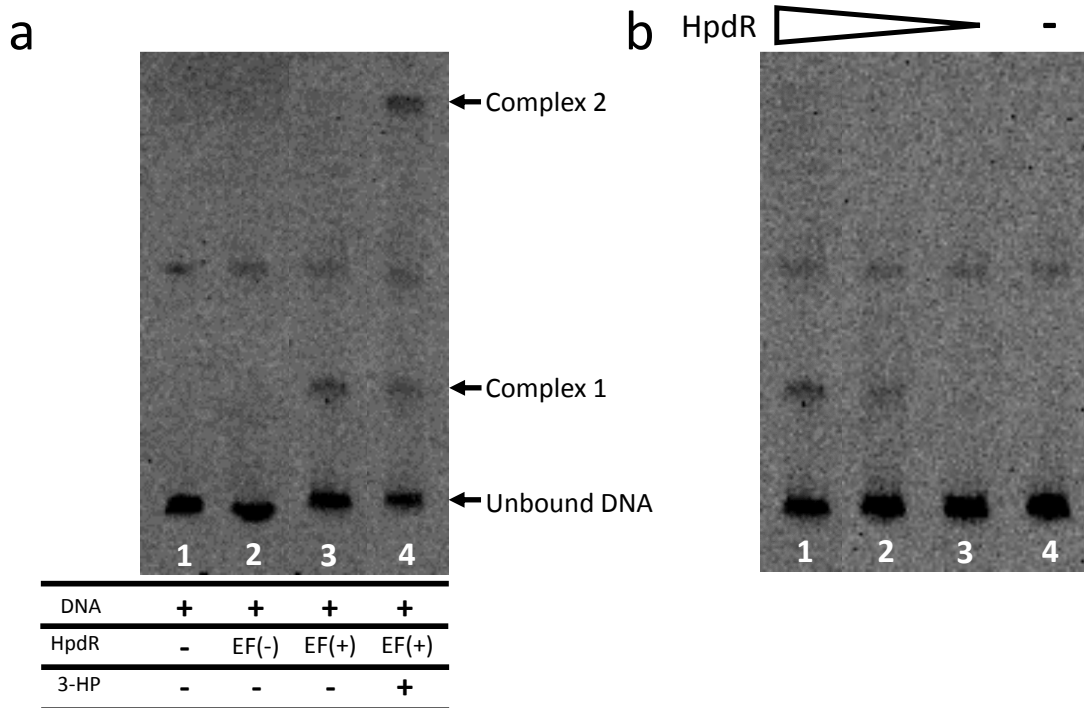

## 1 **Supplementary References**

- 2 1 Jørgensen, C. & Dandanell, G. Isolation and characterization of mutations in the  
3 *Escherichia coli* regulatory protein XapR. *J. Biotechnol.* **181**, 4397-4403 (1999).
- 4 2 Pande, S.G. et al. *Lactobacillus brevis* responds to flavonoids through KaeR, a LysR-type  
5 of transcriptional regulator. *Mol. Microbiol.* **81**, 1623-1639 (2011).
- 6 3 Pfeiffer, D. & Jendrossek, D. Interaction between poly(3-hydroxybutyrate) granule-  
7 associated proteins as revealed by two-hybrid analysis and identification of a new phasin in  
8 *Ralstonia eutropha* H16. *Microbiology* **157**, 2795-2807 (2011).
- 9 4 Bi, C. et al. Development of a broad-host synthetic biology toolbox for *Ralstonia eutropha*  
10 and its application to engineering hydrocarbon biofuel production. *Microb. Cell Fact.*  
11 **12** (2013).
- 12 5 Ko, M. & Park, C. H-NS-dependent regulation of flagellar synthesis is mediated by a  
13 LysR family protein. *J. Bacteriol.* **182**, 4670-4672 (2000).
- 14 6 Hoffmann, J. & Altenbucher, J. Functional characterization of the mannitol promoter of  
15 *Pseudomonas fluorescens* DSM 50106 and its application for a mannitol-inducible  
16 expression system for *Pseudomonas putida* KT2440. *PLoS ONE* **10** (2015).
